# Supplementary figures and images for: Architecture of TAF11/TAF13/TBP complex suggests novel regulation properties of general transcription factor TFIID
Source: eLife journal article supplement (doi:10.7554/elife.30395), 2017-11-07

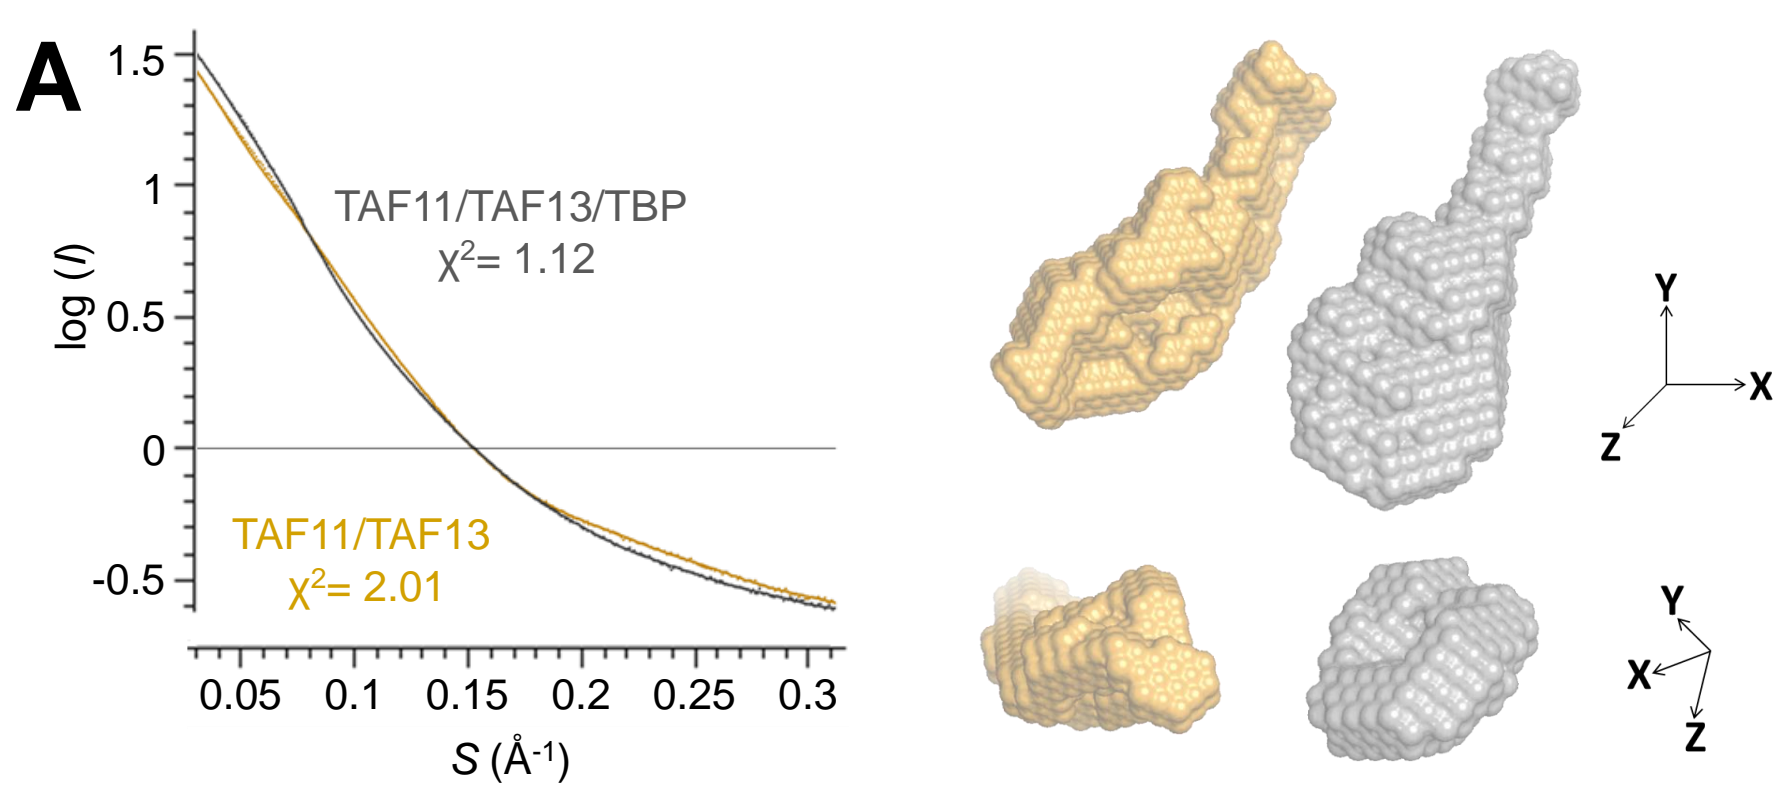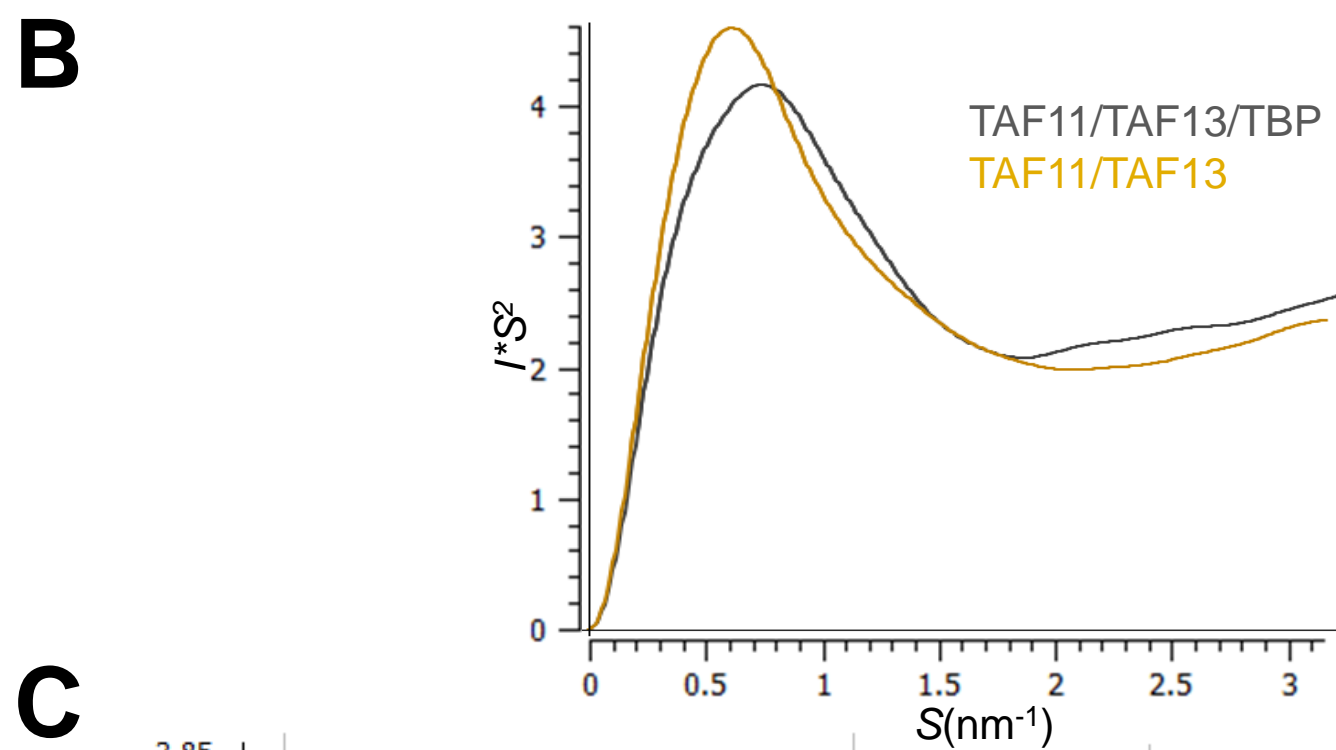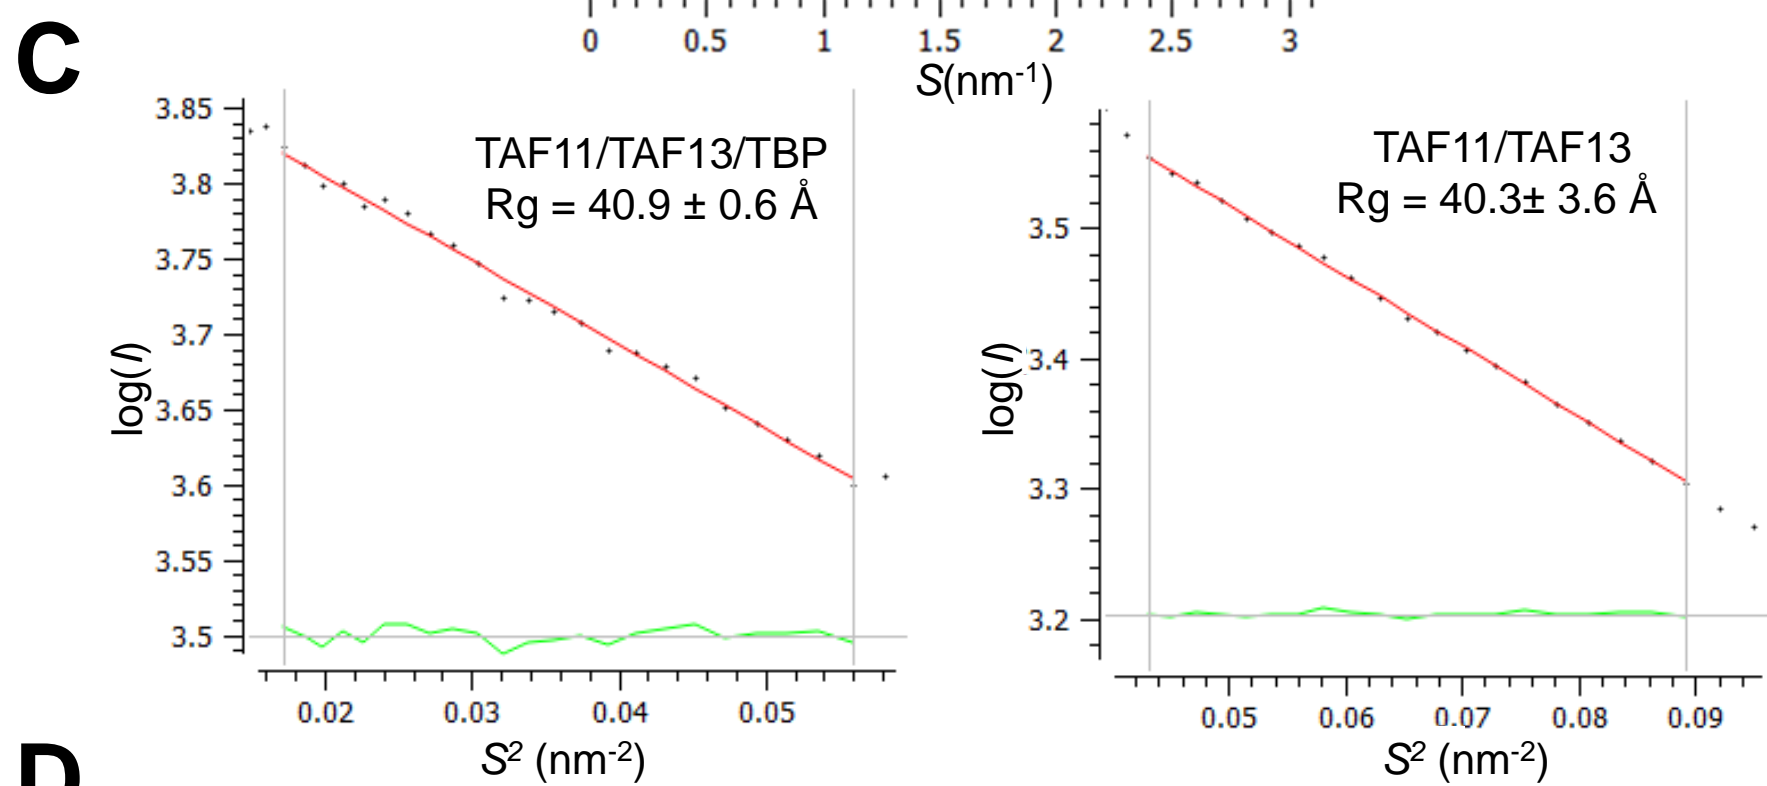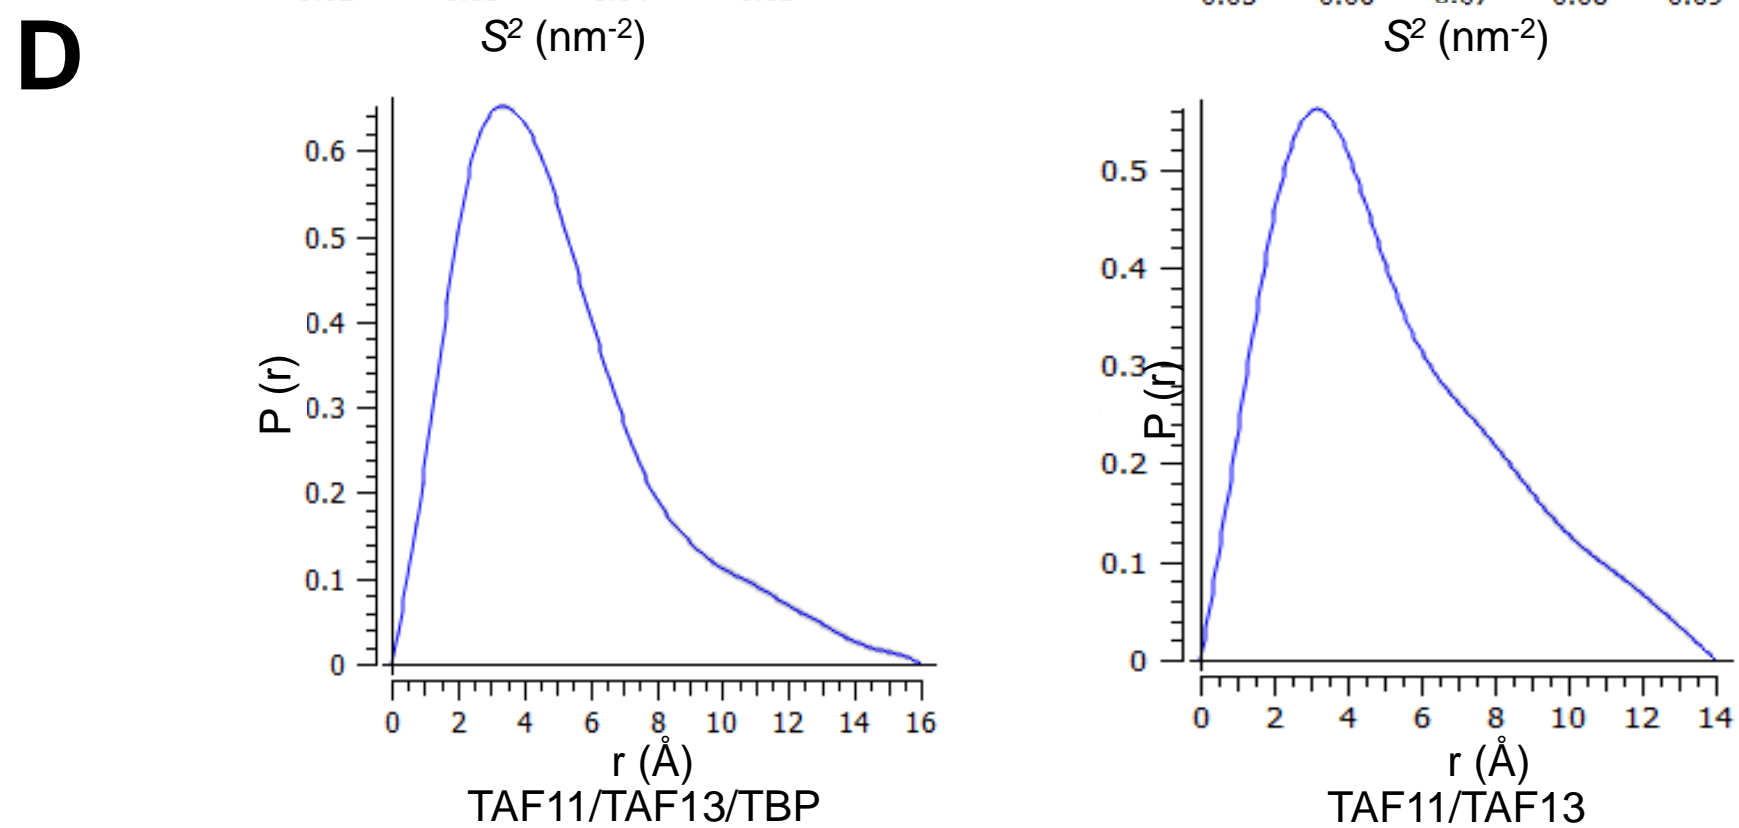

Supplement: supp [file elife_poa_e30395_Figure_3_figure_supplement_1.pdf › elife_poa_e30395_Figure_3_figure_supplement_1.pdf]

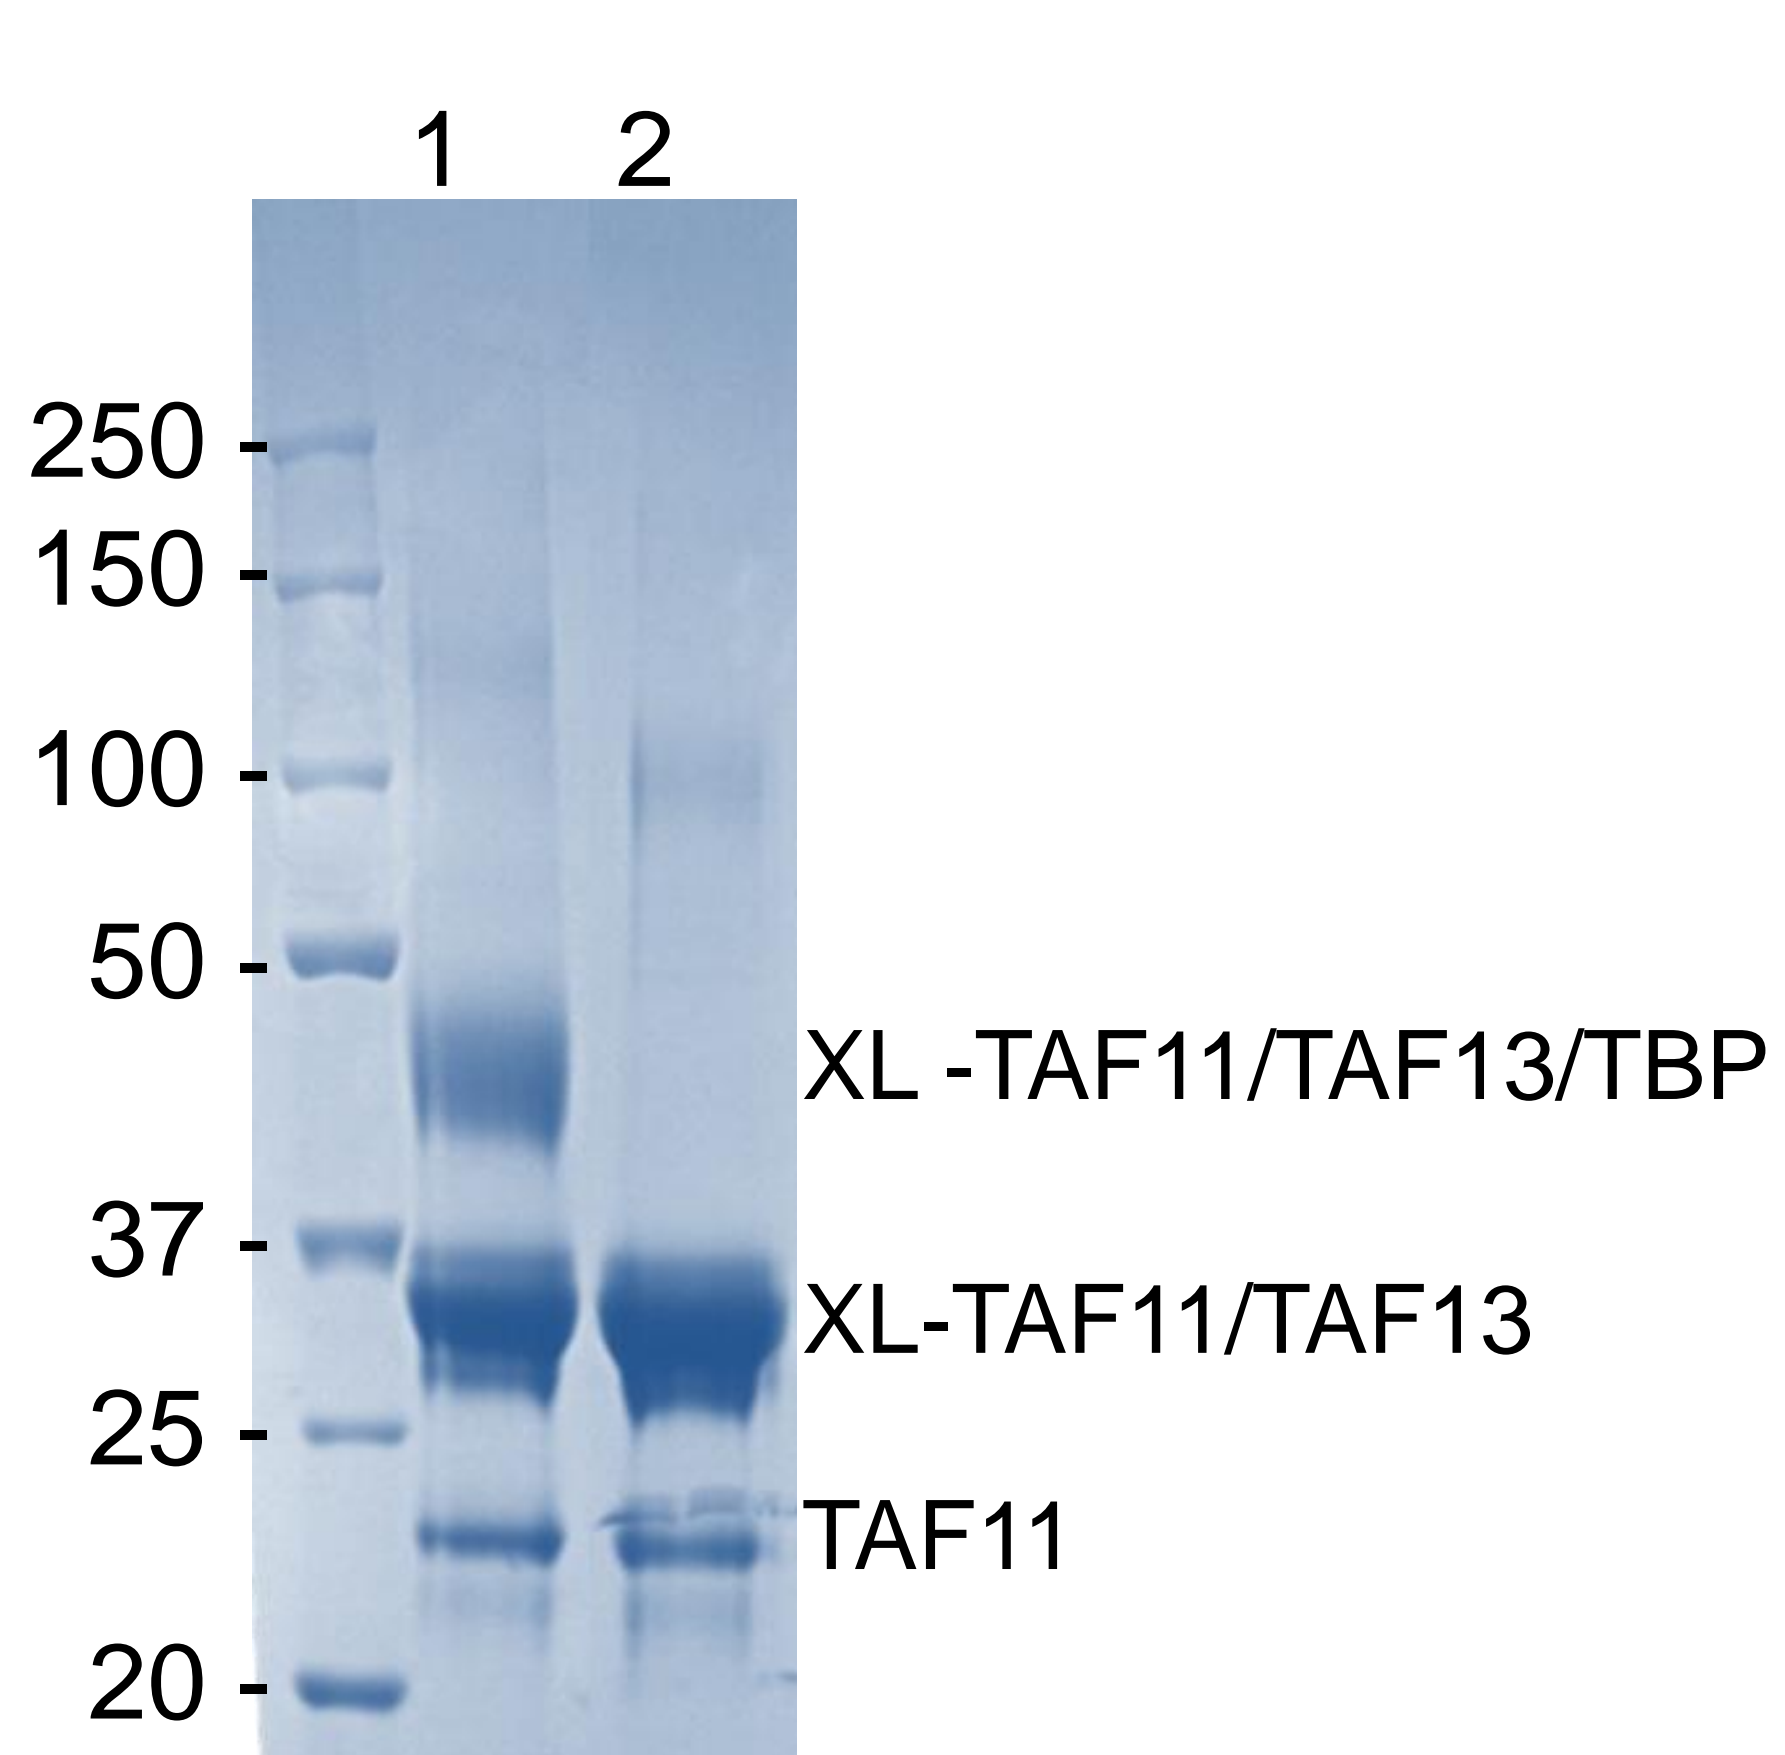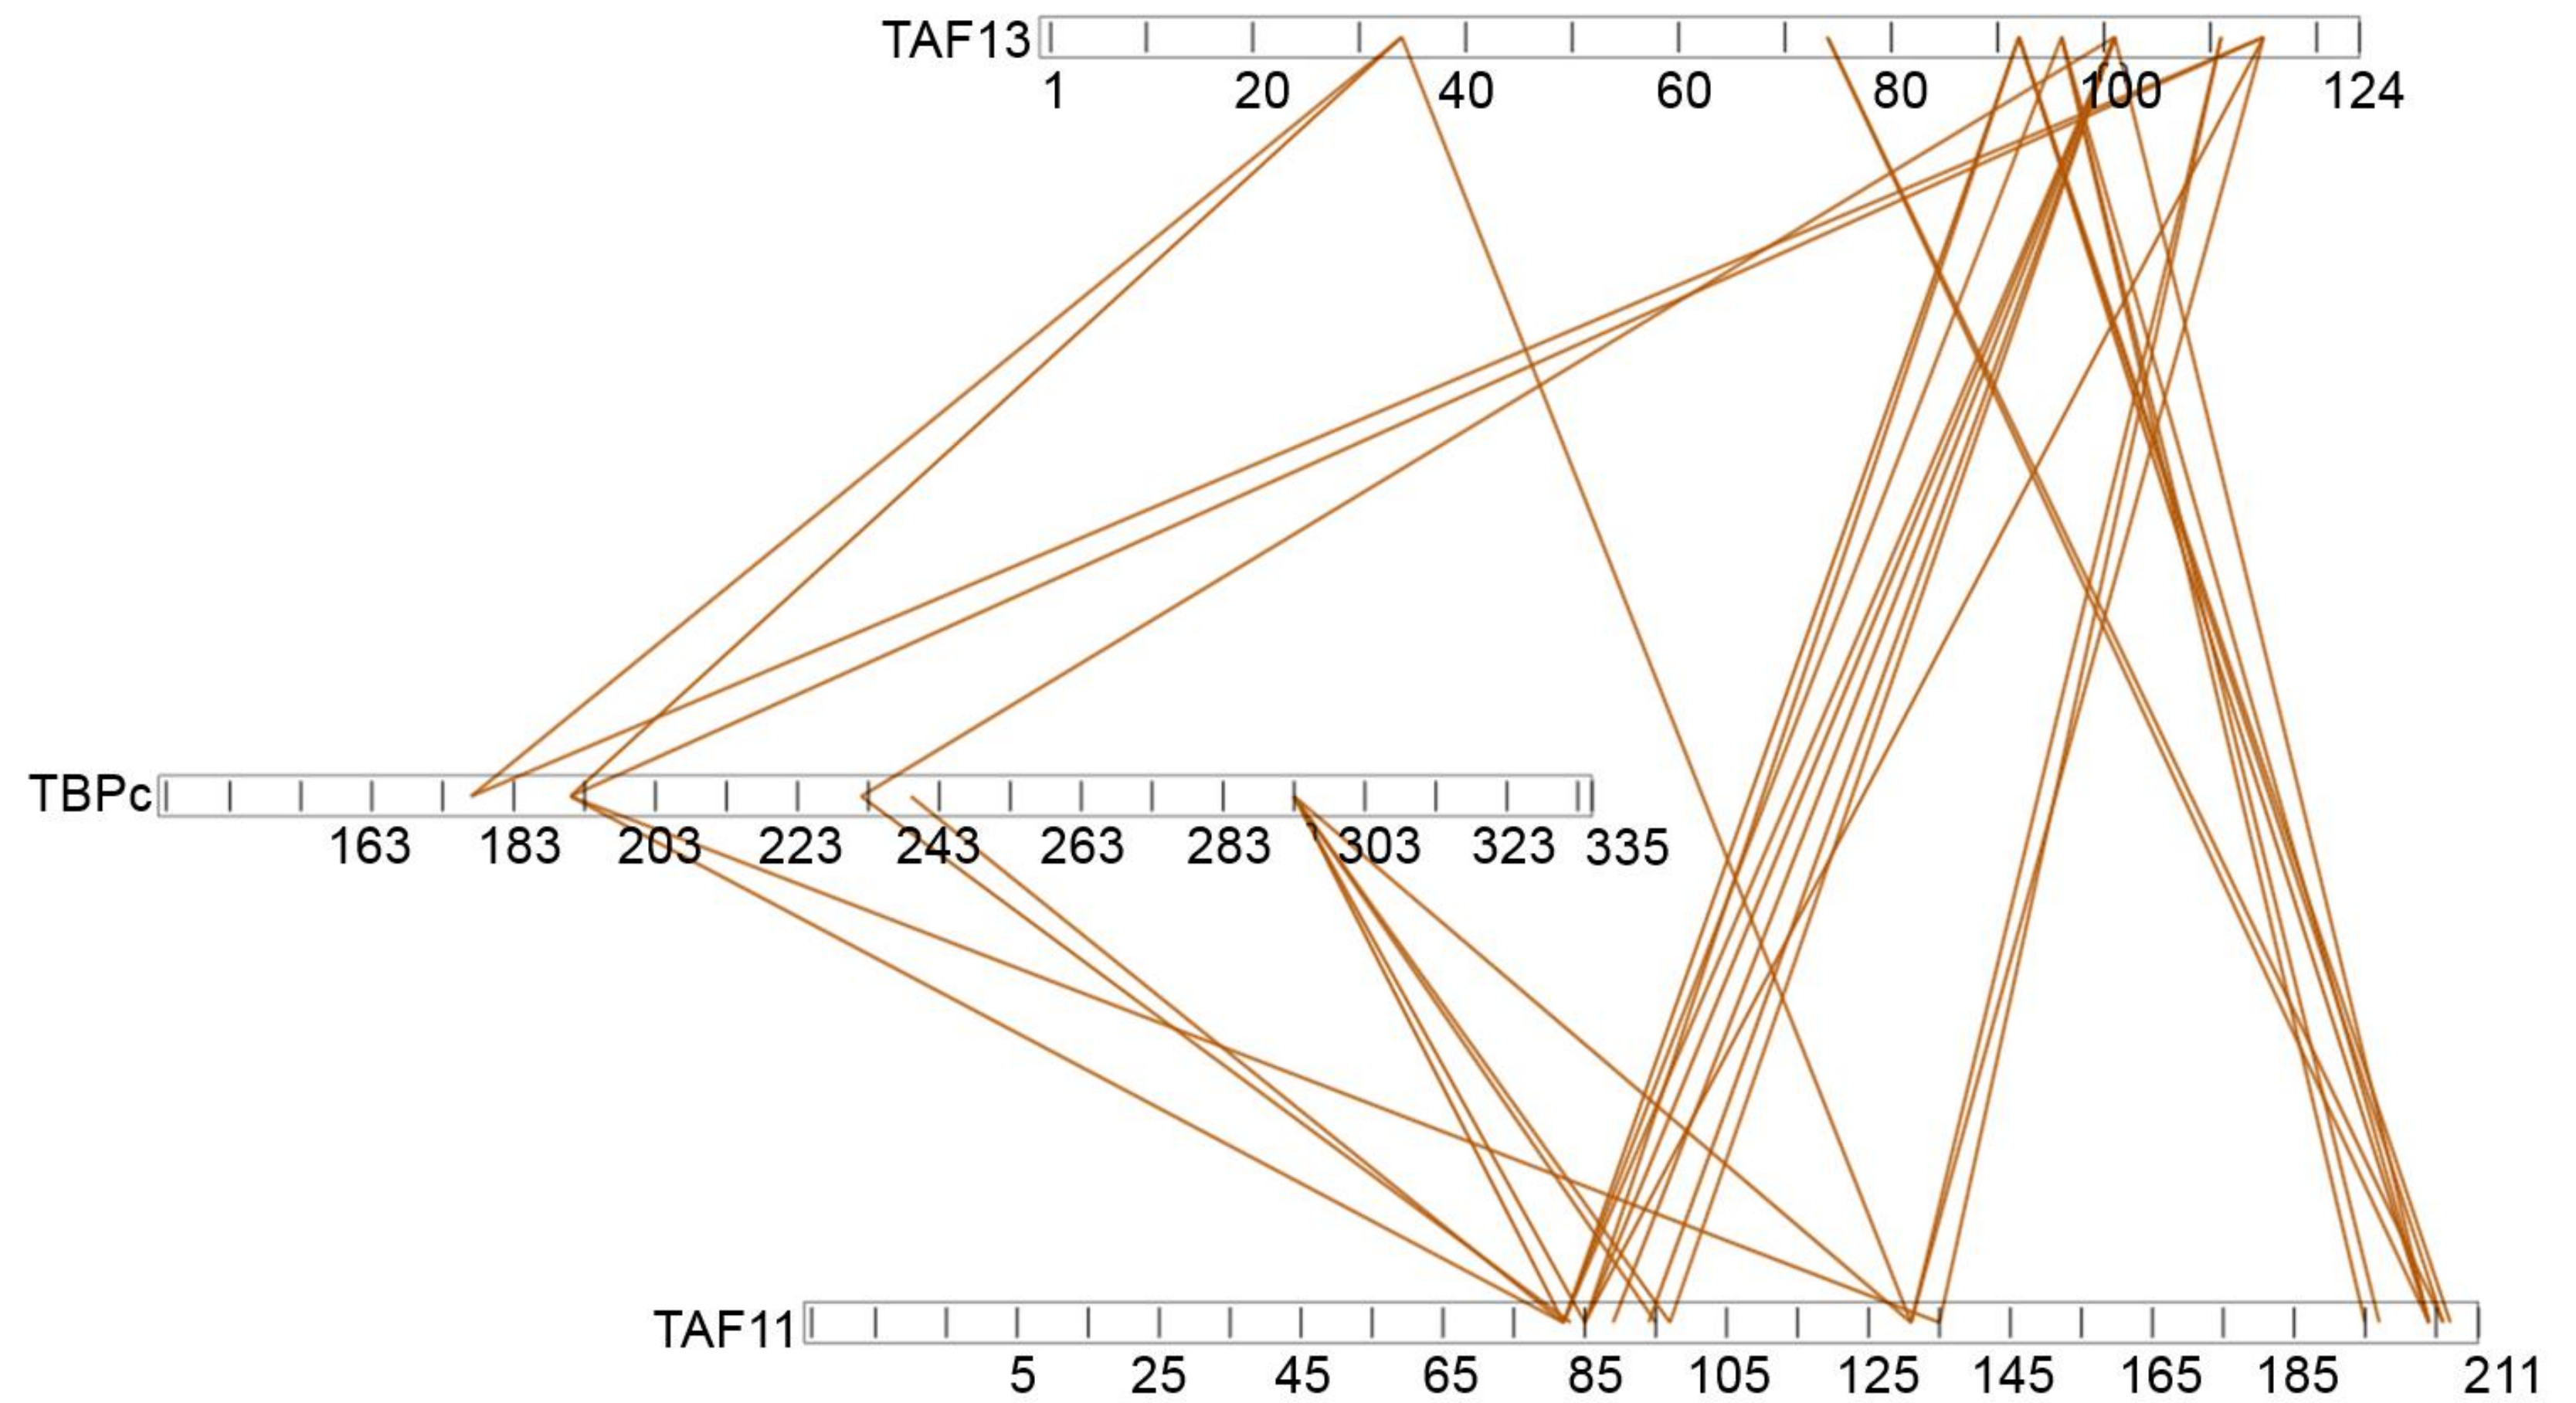

Supplement: supp [file elife_poa_e30395_Figure_3_figure_supplement_2.pdf › elife_poa_e30395_Figure_3_figure_supplement_2.pdf]

**A**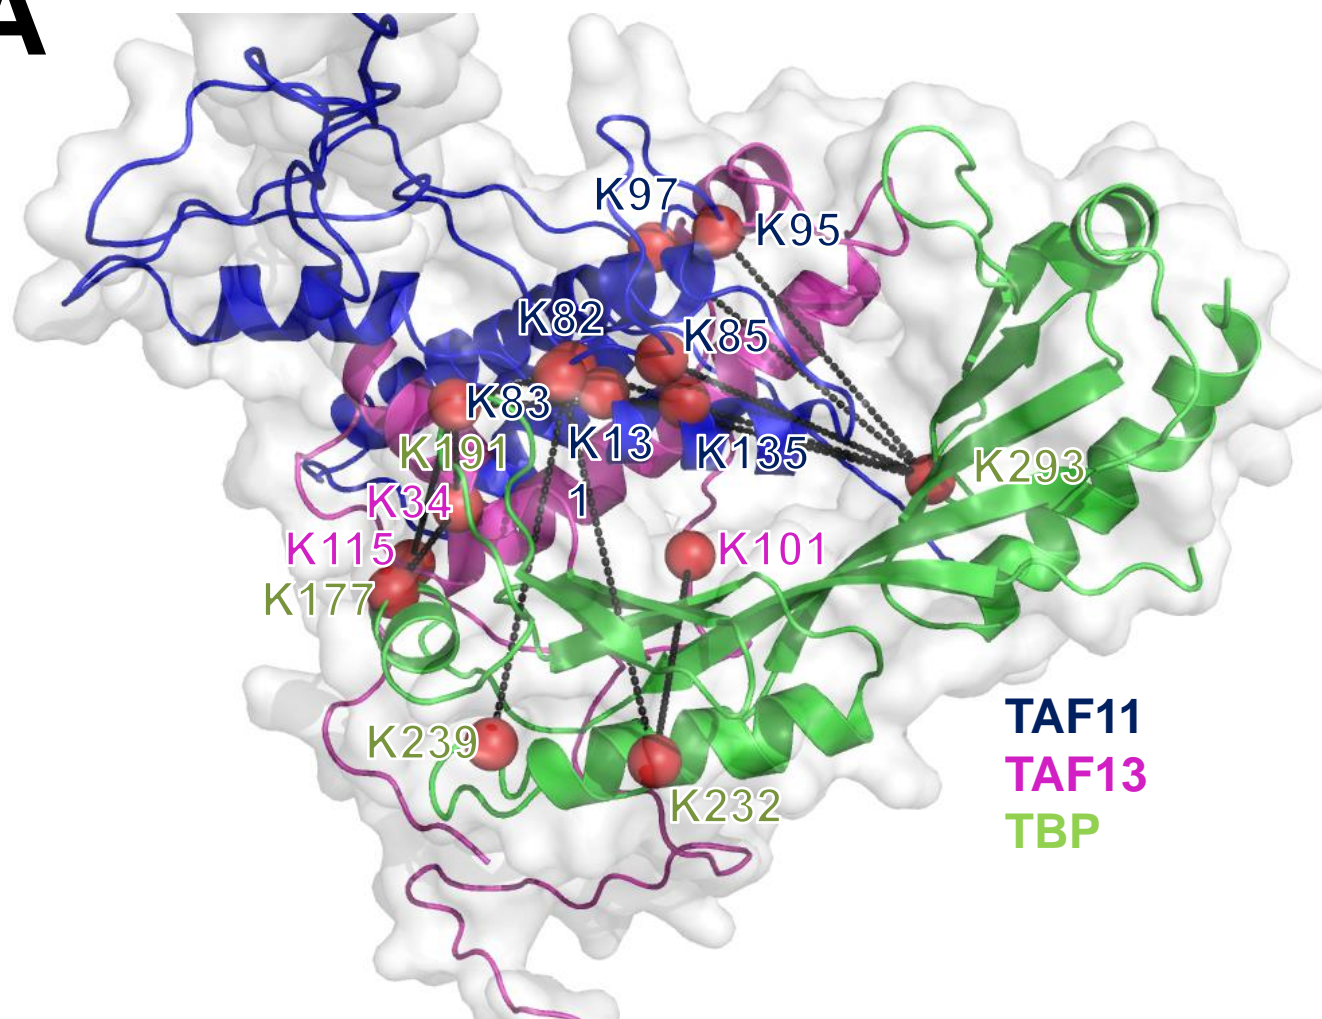**B**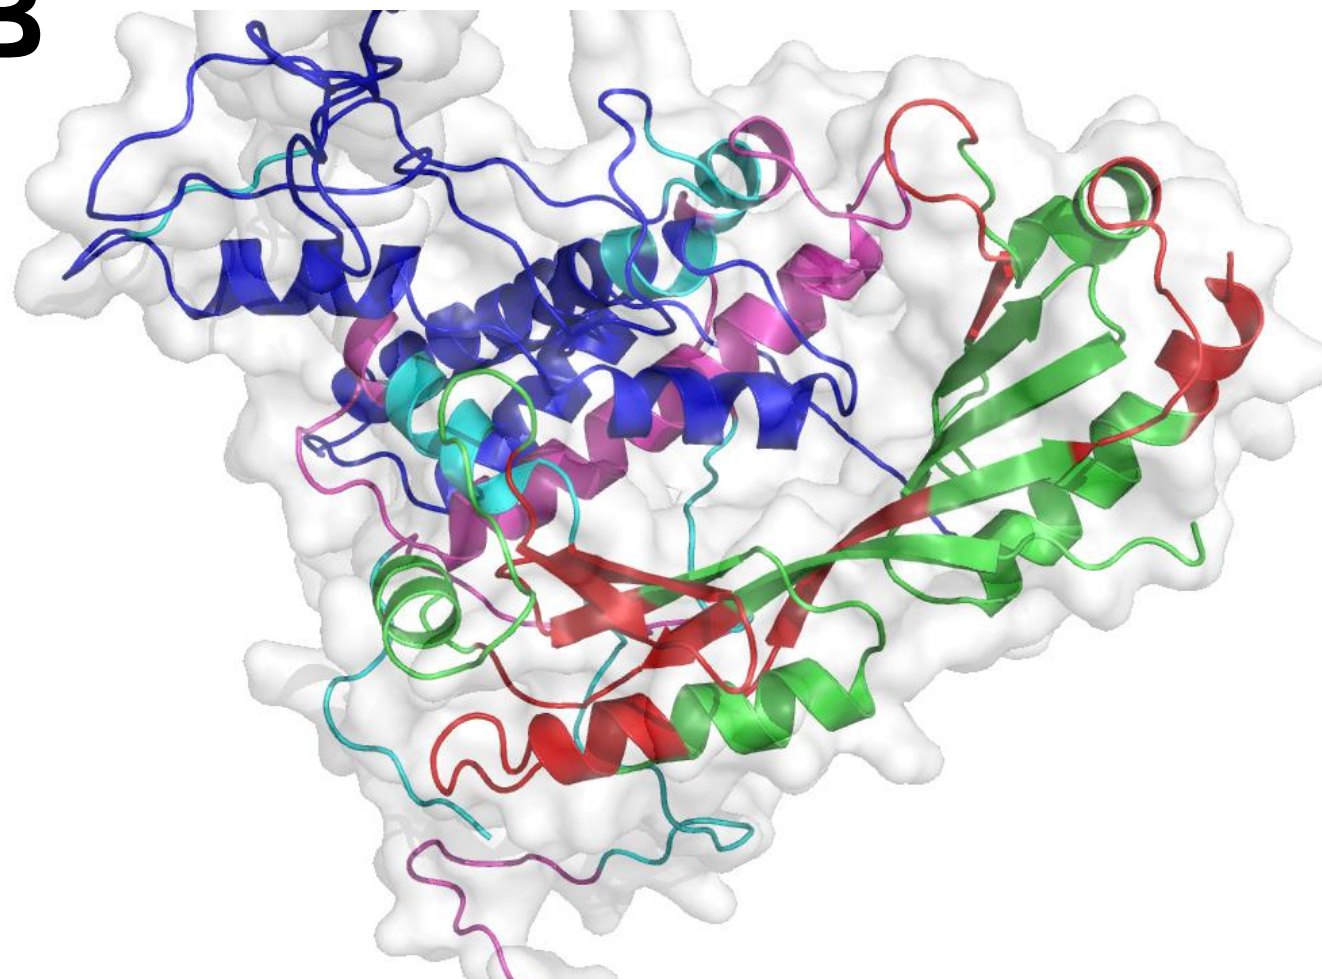

Supplement: supp [file elife_poa_e30395_Figure_3_figure_supplement_3.pdf › elife_poa_e30395_Figure_3_figure_supplement_3.pdf]

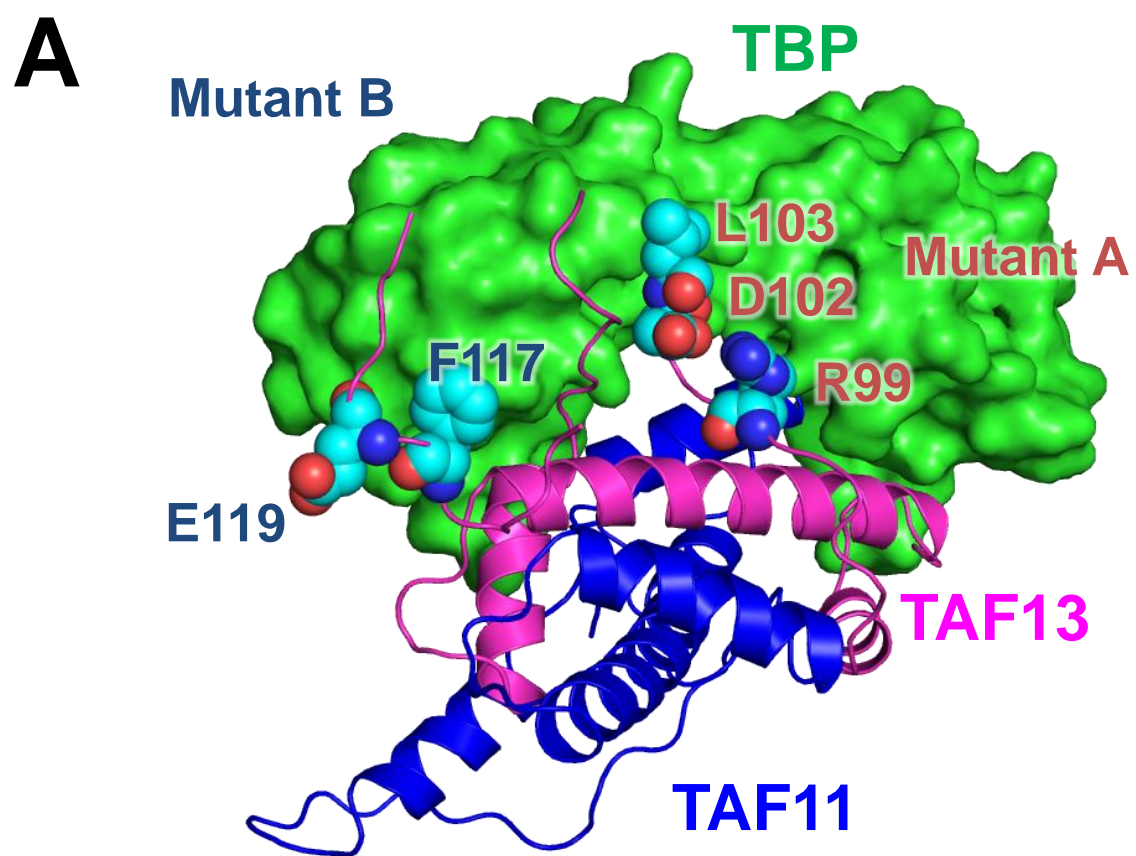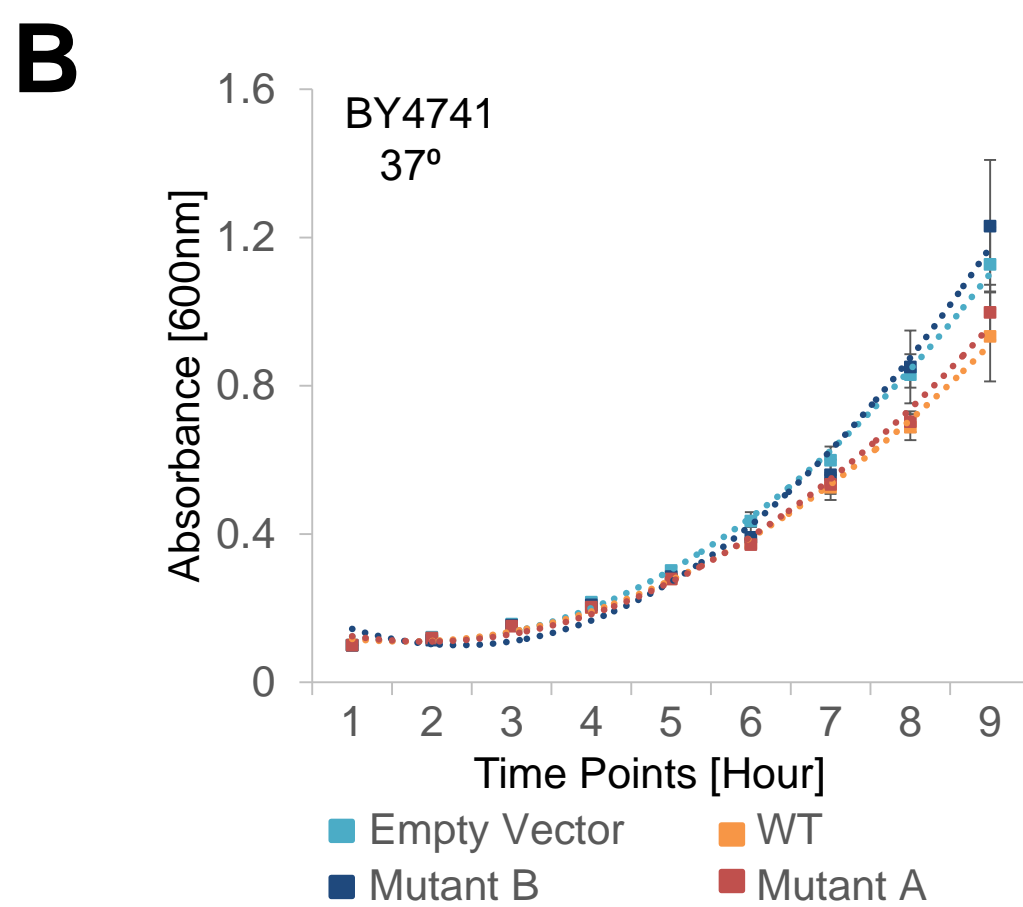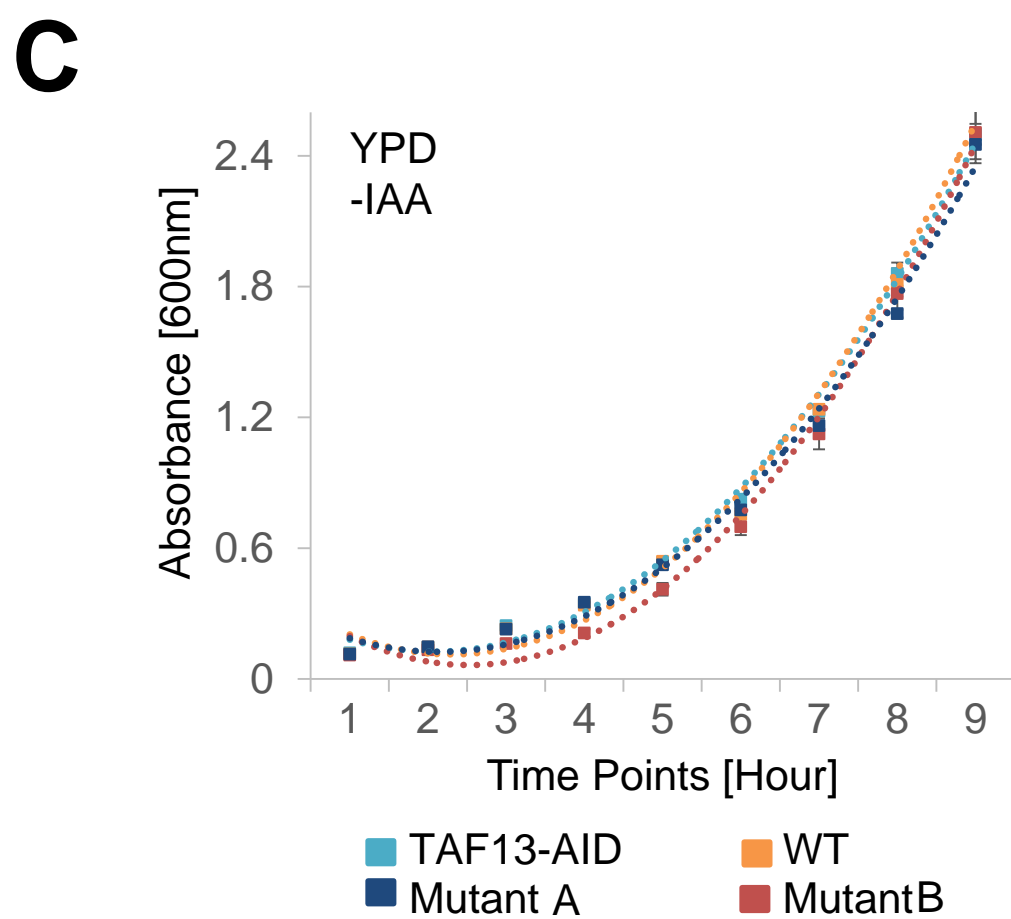

Supplement: supp [file elife_poa_e30395_Figure_4_figure_supplement_1.pdf › elife_poa_e30395_Figure_4_figure_supplement_1.pdf]
